# Supplementary material for: Deciphering the Mechanisms of Improved Immunogenicity of Hypochlorous Acid-Treated Antigens in Anti-Cancer Dendritic Cell-Based Vaccines
Source: MDPI journal article supplement (doi:10.3390/vaccines8020271), 2020-06-02
Supplement: s1 [file s1]

|                | HLA-I              |                    |                    | HLA-II                   |                          |                          |
|----------------|--------------------|--------------------|--------------------|--------------------------|--------------------------|--------------------------|
| A375 cell line | A*01:01<br>A*02:01 | B*57:01<br>B*44:03 | C*16:02<br>C*06:02 | DQA1*03:02<br>DQA1*02:01 | DQB1*03:03<br>DQB1*03:03 | DRB*:04:05<br>DRB1*07:01 |
| Donor 1        | A*03:01<br>A*24:02 | B*07:02<br>B*35:03 | C*07:02<br>C*12:03 | DQA1*01:04<br>DQA1*05:05 | DQB*:03:01<br>DQB1*05:03 | DRB1*12:01<br>DRB1*14:54 |

**Supplemental Table 1.** HLA typing of the A375 melanoma cell line (retrieved from (1)) and of donor 1 cells used for immunopeptidomics analysis.

References:

1. Boegel, S.; Löwer, M.; Bukur, T.; Sahin, U.; Castle, J.C. A catalog of HLA type, HLA expression, and neopeptide candidates in human cancer cell lines. *Oncoimmunology* **2014**, *3*, e954893, doi:10.4161/21624011.2014.954893.
